# Supplementary material for: Heme Oxygenase-1 Inhibitors Induce Cell Cycle Arrest and Suppress Tumor Growth in Thyroid Cancer Cells
Source: MDPI journal article supplement (doi:10.3390/ijms19092502), 2018-08-24
Supplement: s1 [file s1]

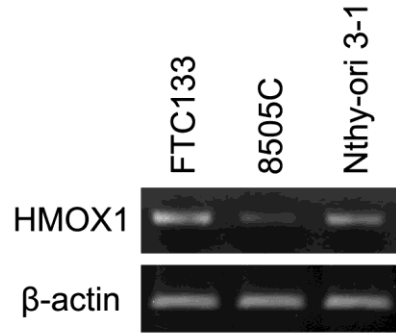

**Figure S1.** RNA expression of heme oxygenase-1 (HMOX1) in thyroid cancer cell lines (FTC-133 and 8505C) and a normal thyroid cell line (Nthy-ori 3-1).

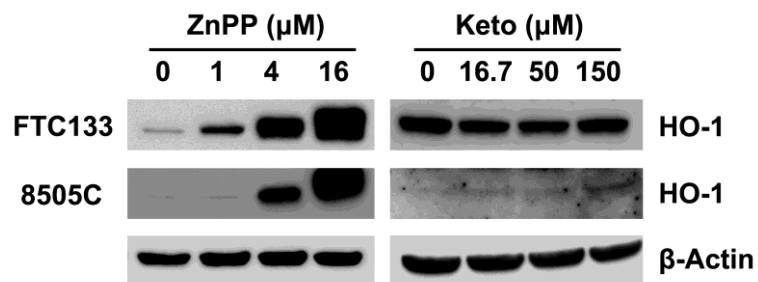

**Figure S2.** Expression of heme oxygenase-1 (HO-1) in thyroid cancer cell lines (FTC-133 and 8505C) following treatment with HO-1 inhibitors, zinc protoporphyrin-IX (ZnPP) and ketoconazole (Keto), for 24 h.

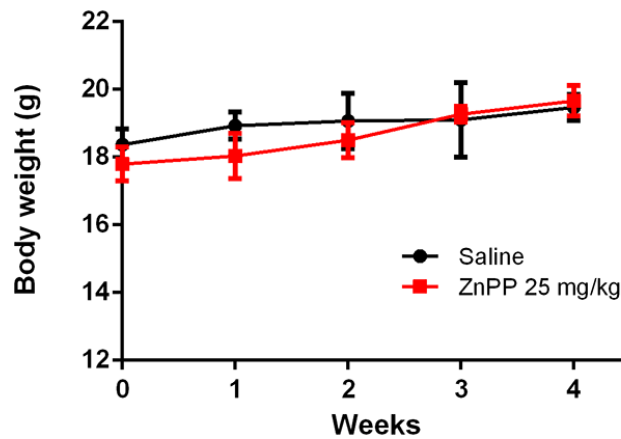

**Figure S3.** Changes in body weight following treatment with zinc protoporphyrin-IX (ZnPP) or saline control in nude mice with subcutaneous implantation of FTC-133 thyroid cancer cells.
